# Supplementary material for: Multiple emission bands NIR-persistent luminescence mSiO2@Zn0.6Ca0.4Ga2O4:Cr3+,Yb3+ nanoparticles for biological applications
Source: Royal Society of Chemistry journal article supplement (doi:10.1039/d0tb02552f), 2020-12-19
Supplement: d0tb02552f1.pdf [file d0tb02552f1.pdf]

## Supporting Information

### A multiple emission bands NIR persistent luminescence nanoparticles $m\text{SiO}_2@\text{Zn}_{0.6}\text{Ca}_{0.4}\text{Ga}_2\text{O}_4: \text{Cr}^{3+}, \text{Yb}^{3+}$ for biological applications

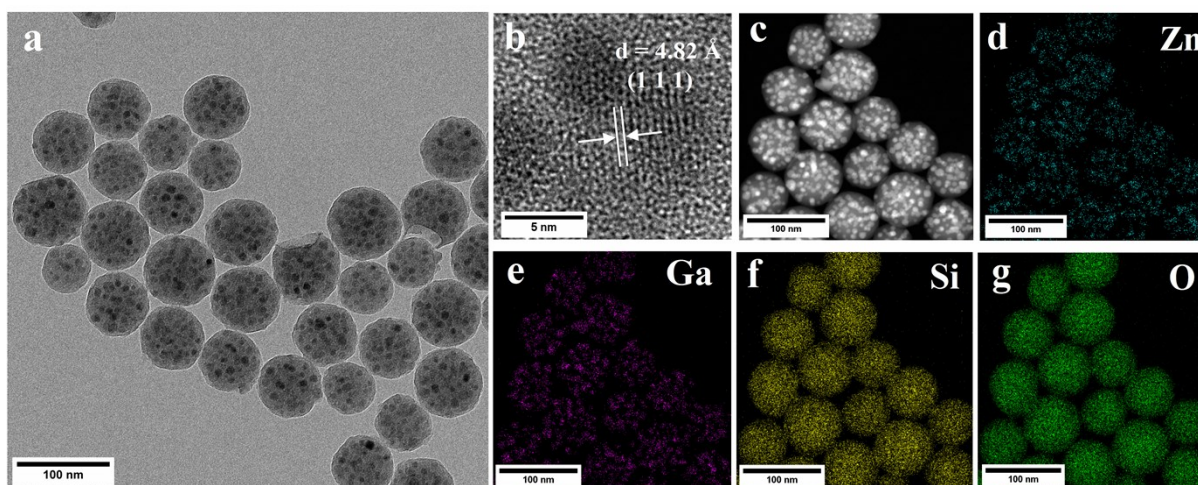

**Figure S1** (a) TEM image of  $m\text{SiO}_2@\text{ZGO}$  nanocrystals. (b) HRTEM image of  $m\text{SiO}_2@\text{ZGO}$  nanocrystals. (c) High angle annular dark field scanning transmission electron microscopy (HAADF-STEM) image and (d-g) HAADF-STEM-EDS mapping images of  $m\text{SiO}_2@\text{ZGO}$  nanocrystals.

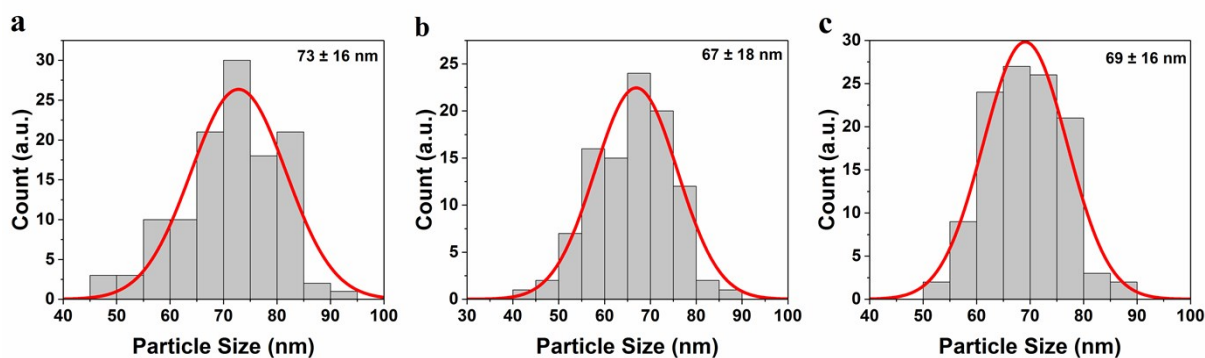

**Figure S2** Size distribution of the as-synthesized (a)  $m\text{SiO}_2$ , (b)  $m\text{SiO}_2@\text{ZGO}$  and (c)  $m\text{SiO}_2@\text{ZGO}$  nanocrystals, which was obtained by calculating 100 particles in the TEM images.

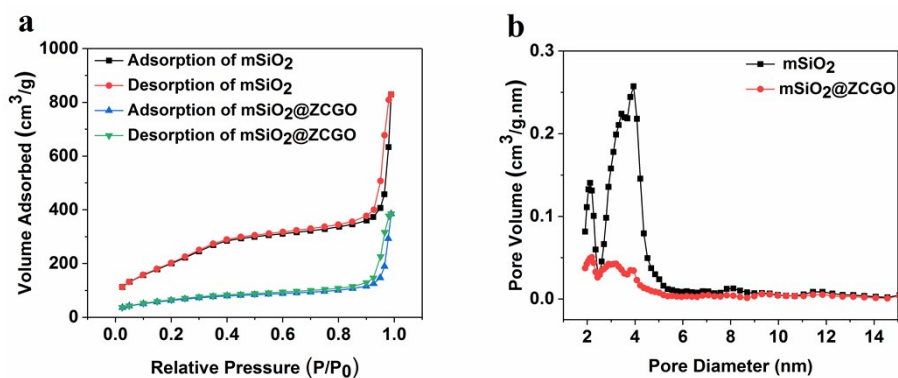

**Figure S3** (a) N<sub>2</sub> adsorption/desorption isotherms and (b) pore size distributions of mSiO<sub>2</sub> and mSiO<sub>2</sub>@ZCGO nanocrystals, respectively.

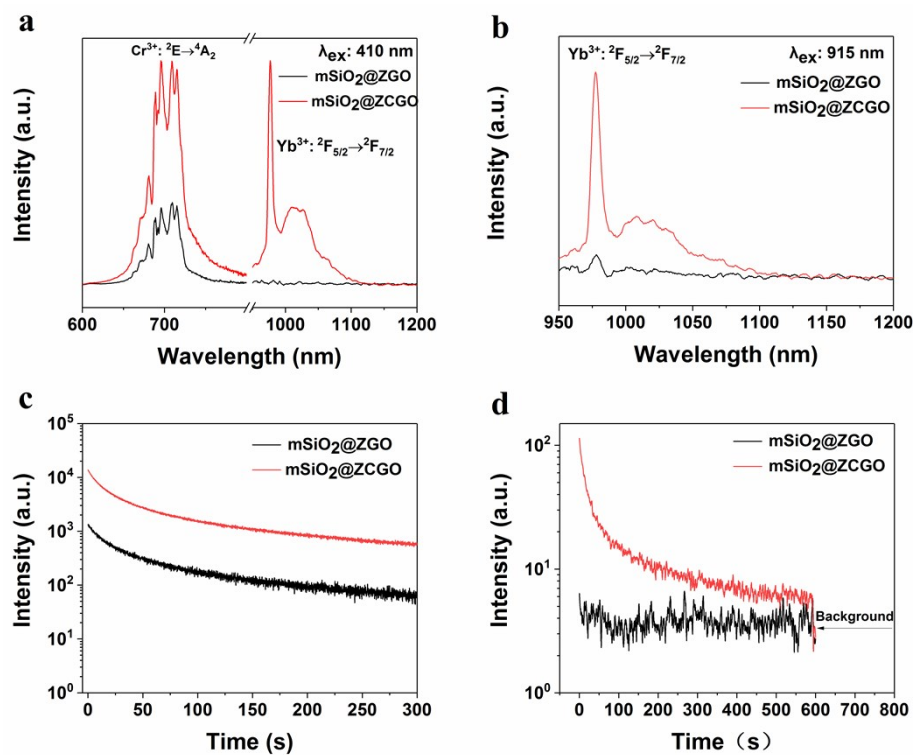

**Figure S4** (a) Photoluminescence (PL) spectra measured by excitation at 410 nm for mSiO<sub>2</sub>@ZGO and mSiO<sub>2</sub>@ZCGO nanocrystals, respectively. (b) PL spectra measured by excitation at 915 nm for mSiO<sub>2</sub>@ZGO and mSiO<sub>2</sub>@ZCGO nanocrystals, respectively. Persistent luminescence decay curves measured by monitoring the emissions at (c) 696 nm and (d) 977 nm of mSiO<sub>2</sub>@ZGO and mSiO<sub>2</sub>@ZCGO nanocrystals after being illuminated with a 254-nm UV lamp for 1 min and 10 min, respectively.

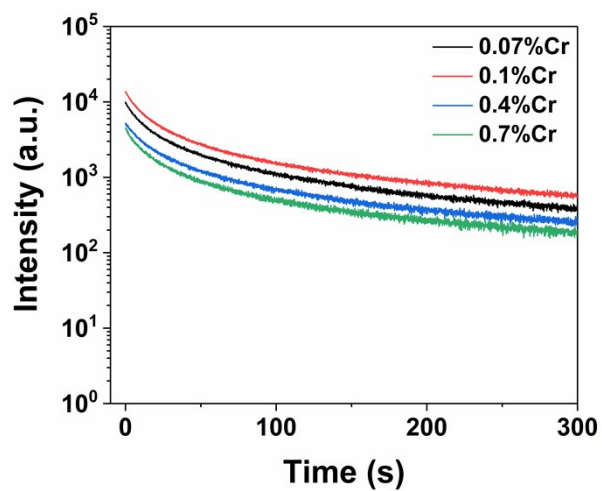

**Figure S5** Persistent luminescence decay curves measured by monitoring the emission at 696 nm of mSiO<sub>2</sub>@ZCGO nanocrystals with various contents of Cr<sup>3+</sup> ions (0.07 - 0.7 % mol) after being illuminated with a 254-nm UV lamp for 1 min.

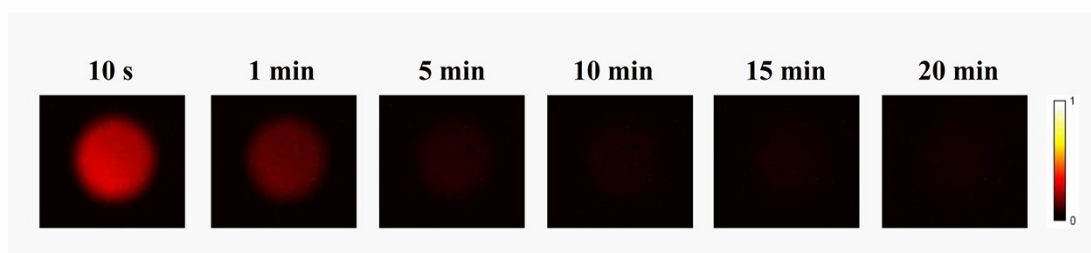

**Figure S6** Yb<sup>3+</sup> ions persistent luminescence images of mSiO<sub>2</sub>@ZCGO nanocrystals recorded at different delayed time by an InGaAs camera after the sample has been illuminated with a 254-nm UV lamp for 10 min. The exposure time of the InGaAs camera is 1s.
